# Supplementary material
Source: PubMed Central journal article supplement (PMC9494045)
Supplement: gfac209_supplemental_file.pdf [file gfac209_supplemental_file.pdf]

## **Supplementary materials**

### **Contents**

Supplementary Table 1. Severe Covid-19 outcomes by variant and time period.

Supplementary Table 2. Association of vaccination with severe Covid-19 outcomes in subgroups with SARS-CoV-2 infection.

Supplementary Table 3. Association of vaccination with severe Covid-19 outcomes in sensitivity analyses.

**Supplementary Table 1.** Severe Covid-19 outcomes by variant and time period.

|                    | N <sup>a</sup> | Admission <sup>b</sup> | Oxygen <sup>c</sup> | Ventilation <sup>c</sup> | Death <sup>c</sup> |
|--------------------|----------------|------------------------|---------------------|--------------------------|--------------------|
| <u>Variant</u>     |                |                        |                     |                          |                    |
| Delta              | 16             | 5 (31)                 | 3 (19)              | 2 (13)                   | 2 (13)             |
| Omicron            | 198            | 41 (21)                | 21 (11)             | 8 (4)                    | 6 (3)              |
| Unknown            | 912            | 114 (13)               | 59 (6)              | 27 (3)                   | 20 (2)             |
| <u>Time period</u> |                |                        |                     |                          |                    |
| Weeks 1-2          | 151            | 23 (15)                | 13 (9)              | 4 (3)                    | 3 (2)              |
| Weeks 3-4          | 644            | 98 (15)                | 52 (8)              | 23 (4)                   | 17 (3)             |
| Weeks 5-6          | 331            | 39 (12)                | 18 (5)              | 10 (3)                   | 8 (2)              |

Data are number (%) within subgroup specified

Clinical outcomes are 'all cause', not specifically due to Covid-19

<sup>a</sup>Number within subgroup

<sup>b</sup>Within 14 days of positive PCR

<sup>c</sup>Within 28 days of positive PCR

**Supplementary Table 2.** Association of vaccination with severe Covid-19 outcomes in subgroups with SARS-CoV-2 infection.

| Subgroup                        | Vaccinations <sup>a</sup> | Odds ratio (95%CI) for severe Covid-19 outcomes |                    |                     |                    |                          |             |                    |             |
|---------------------------------|---------------------------|-------------------------------------------------|--------------------|---------------------|--------------------|--------------------------|-------------|--------------------|-------------|
|                                 |                           | Admission <sup>b</sup>                          |                    | Oxygen <sup>c</sup> |                    | Ventilation <sup>c</sup> |             | Death <sup>c</sup> |             |
| 65-94 years                     | Two                       | 0.66                                            | (0.29-1.52)        | 0.80                | (0.28-2.26)        | 1.42                     | (0.29-7.06) | 1.19               | (0.29-4.85) |
|                                 | Three                     | <b>0.35</b>                                     | <b>(0.15-0.85)</b> | 0.33                | (0.11-1.02)        | 0.57                     | (0.10-3.13) | 0.76               | (0.18-3.25) |
|                                 | Three (ref Two)           | <b>0.54</b>                                     | <b>(0.29-0.98)</b> | <b>0.42</b>         | <b>(0.20-0.89)</b> | 0.40                     | (0.14-1.11) | 0.64               | (0.26-1.56) |
| 19-64 years                     | Two                       | <b>0.52</b>                                     | <b>(0.29-0.94)</b> | 0.57                | (0.26-1.23)        | 0.83                     | (0.31-2.19) | 0.90               | (0.31-2.58) |
|                                 | Three                     | <b>0.22</b>                                     | <b>(0.11-0.47)</b> | 0.53                | (0.23-1.23)        | 0.66                     | (0.23-1.92) | 0.75               | (0.24-2.35) |
|                                 | Three (ref Two)           | <b>0.42</b>                                     | <b>(0.21-0.84)</b> | 0.94                | (0.43-2.05)        | 0.79                     | (0.31-2.04) | 0.83               | (0.31-2.24) |
| Immune suppression <sup>d</sup> | Two                       | 0.44                                            | (0.14-1.35)        | 0.28                | (0.05-1.46)        | 0.52                     | (0.09-2.83) | 0.67               | (0.09-4.80) |
|                                 | Three                     | <b>0.23</b>                                     | <b>(0.07-0.79)</b> | 0.42                | (0.09-2.04)        | 0.48                     | (0.08-2.85) | 0.62               | (0.08-4.72) |
|                                 | Three (ref Two)           | 0.53                                            | (0.20-1.38)        | 1.50                | (0.42-5.37)        | 0.93                     | (0.22-3.93) | 0.92               | (0.19-4.46) |
| Two vaccines <sup>e</sup>       | Months since              | <b>1.30</b>                                     | <b>(1.17-1.44)</b> | <b>1.45</b>         | <b>(1.22-1.73)</b> | 1.09                     | (0.98-1.22) | 1.09               | (0.97-1.23) |
| Three vaccines <sup>f</sup>     | Months since              | 0.87                                            | (0.60-1.26)        | 1.05                | (0.73-1.49)        | 0.99                     | (0.62-1.59) | 0.99               | (0.61-1.61) |

Odds ratio (95% CI), including variables in Table 2, within subgroup comparing vaccination by group or time since last dose

Clinical outcomes are 'all cause', not specifically due to Covid-19

Vaccination status considered to change after the 7<sup>th</sup> post dose day

<sup>a</sup>Reference none (unvaccinated) except where stated

<sup>b</sup>Within 14 days of positive PCR

<sup>c</sup>Within 28 days of positive PCR

<sup>d</sup>Any immune suppression treatment including steroids, tacrolimus, mycophenolate, azathioprine, cytotoxic and biologic agents

<sup>e</sup>Time since last vaccine dose, in two-dose subgroup only

<sup>f</sup>Time since last vaccine dose, in three-dose subgroup only

**Supplementary Table 3.** Association of vaccination with severe Covid-19 outcomes in sensitivity analyses.

| Condition                 | Vaccinations <sup>a</sup> | Odds ratio (95%CI) for severe Covid-19 outcomes |                    |                     |                    |                          |             |                    |             |
|---------------------------|---------------------------|-------------------------------------------------|--------------------|---------------------|--------------------|--------------------------|-------------|--------------------|-------------|
|                           |                           | Admission <sup>b</sup>                          |                    | Oxygen <sup>c</sup> |                    | Ventilation <sup>c</sup> |             | Death <sup>c</sup> |             |
| Prior SARS-CoV-2 excluded | Two                       | <b>0.53</b>                                     | <b>(0.32-0.88)</b> | 0.53                | (0.27-1.06)        | 1.04                     | (0.43-2.54) | 1.06               | (0.41-2.71) |
|                           | Three                     | <b>0.25</b>                                     | <b>(0.14-0.44)</b> | <b>0.30</b>         | <b>(0.14-0.65)</b> | 0.68                     | (0.26-1.76) | 0.75               | (0.28-2.04) |
| Weeks 1-2 only            | Two                       | 0.63                                            | (0.18-2.24)        | 0.69                | (0.17-2.73)        | 1.03                     | (0.14-7.31) | 0.77               | (0.10-6.10) |
|                           | Three                     | <b>0.19</b>                                     | <b>(0.04-0.95)</b> | 0.36                | (0.07-1.89)        | 0.78                     | (0.08-7.42) | 0.71               | (0.07-7.04) |
| Weeks 3-4 only            | Two                       | 0.80                                            | (0.44-1.46)        | 0.91                | (0.42-1.95)        | 1.26                     | (0.45-3.57) | 1.29               | (0.43-3.89) |
|                           | Three                     | <b>0.34</b>                                     | <b>(0.17-0.67)</b> | 0.56                | (0.24-1.27)        | 0.92                     | (0.31-2.75) | 0.94               | (0.29-3.01) |
| Weeks 4-6 only            | Two                       | <b>0.27</b>                                     | <b>(0.10-0.74)</b> | 0.18                | (0.03-1.06)        | 0.53                     | (0.13-2.13) | 0.21               | (0.02-2.25) |
|                           | Three                     | <b>0.25</b>                                     | <b>(0.09-0.70)</b> | 0.16                | (0.03-1.07)        | 0.31                     | (0.07-1.41) | 0.08               | (0.01-1.55) |

Odds ratio (95% CI), including variables in Table 2, comparing vaccination groups, under condition specified

Clinical outcomes are 'all cause', not specifically due to Covid-19

Vaccination status considered to change after the 7<sup>th</sup> post dose day

<sup>a</sup>Reference none (unvaccinated)

<sup>b</sup>Within 14 days of positive PCR

<sup>c</sup>Within 28 days of positive PCR
